# Supplementary material for: Fumonisin B1 Interaction with Mg-Al and Mg-Fe Layered Double Hydroxides: Removal Efficiency and Mechanisms
Source: MDPI journal article supplement (doi:10.3390/ma13194344), 2020-09-29
Supplement: s1 [file s1]

# Fumonisin B<sub>1</sub> Interaction with Mg-Al and Mg-Fe Layered Double Hydroxides: Removal Efficiency and Mechanisms

Jakub Matusik <sup>1,\*</sup> and Youjun Deng <sup>2</sup>

<sup>1</sup> Faculty of Geology, Geophysics and Environmental Protection; Department of Mineralogy, Petrography and Geochemistry, AGH University of Science and Technology, al. Mickiewicza 30, 30-059 Krakow, Poland

<sup>2</sup> Department of Soil and Crop Sciences, Texas A&M University, College Station, TX 77843-2474, USA; yjd@tamu.edu

\* Correspondence: jmatusik@agh.edu.pl; Tel.: +48-126175233s

Received: 8 September 2020; Accepted: 28 September 2020; Published: date

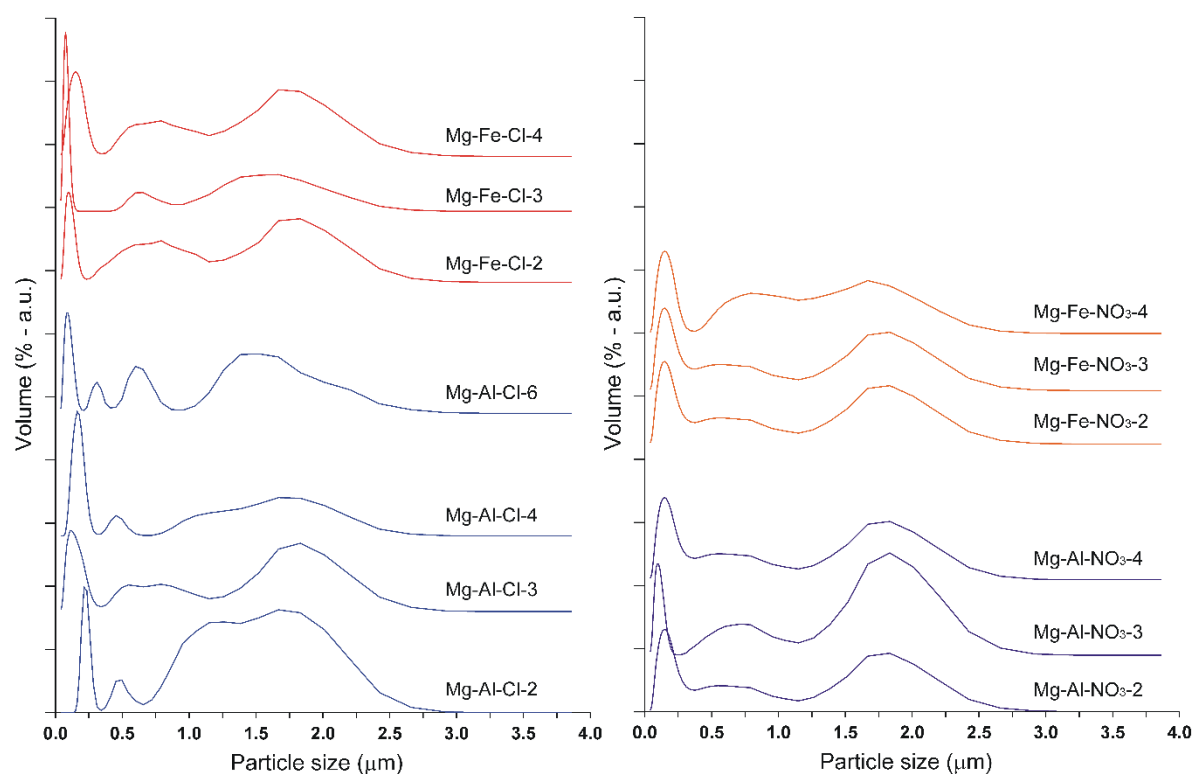

**Figure S1.** Particle size distribution of the raw LDH samples (y axis—Volume (% a.u.)—one spacing on the y axis corresponds to 4%).
